# Supplementary material
Source: PubMed Central journal article supplement (PMC7505724)
Supplement: NIHMS1622926-supplement-2.pdf [file NIHMS1622926-supplement-2.pdf]

A

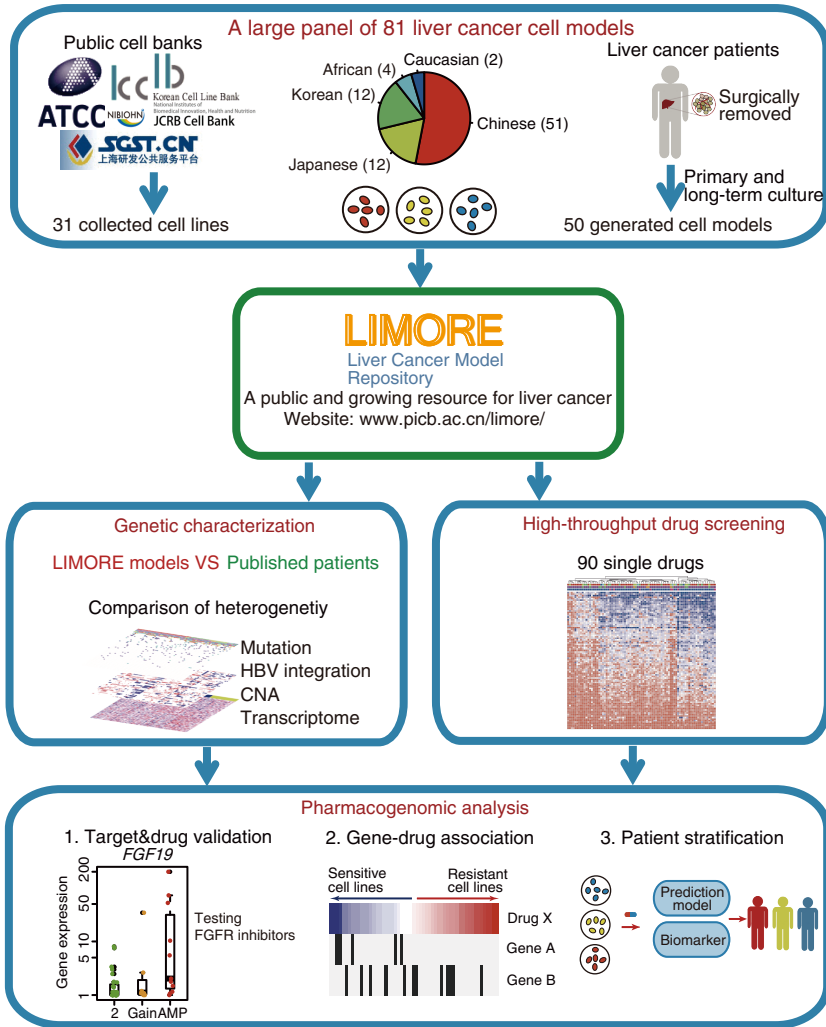

B

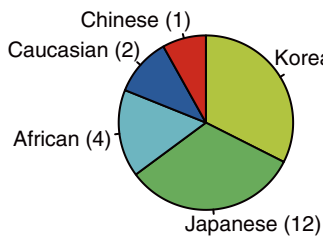

C

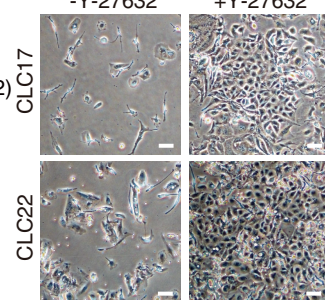

D

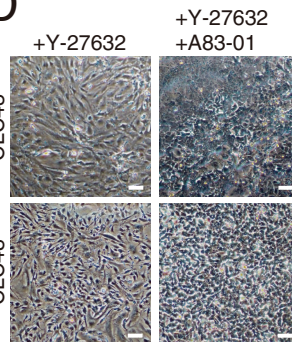

E

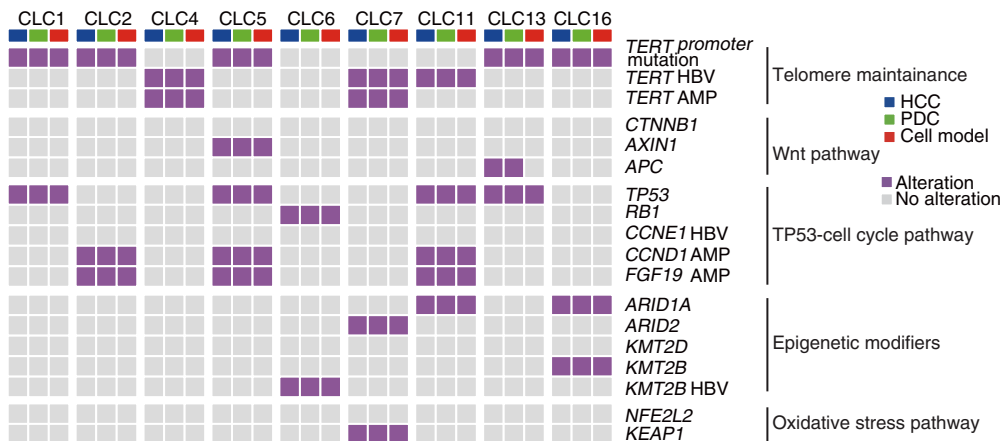

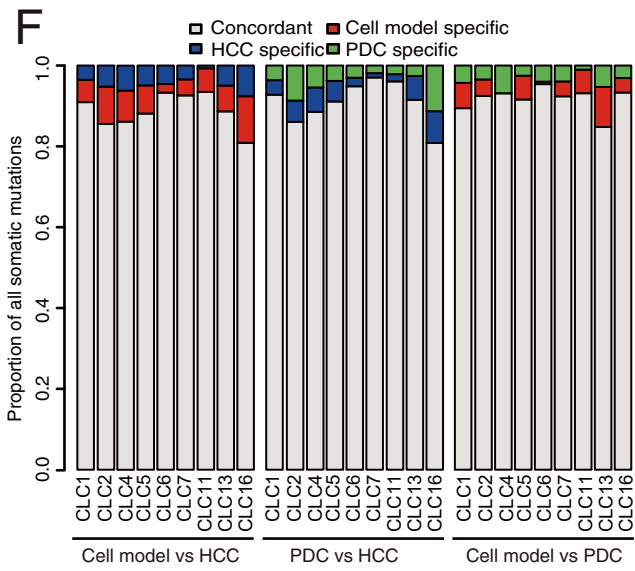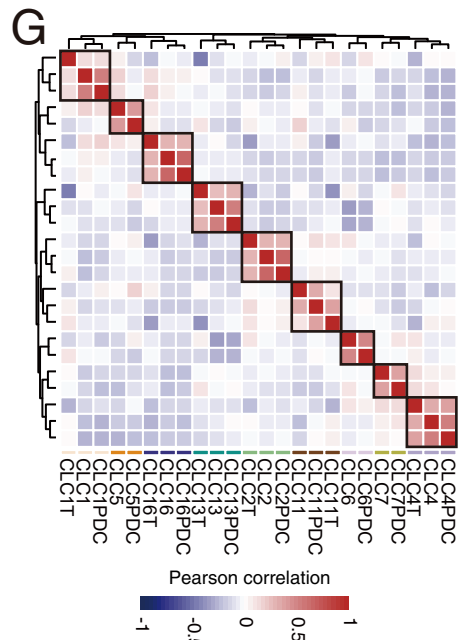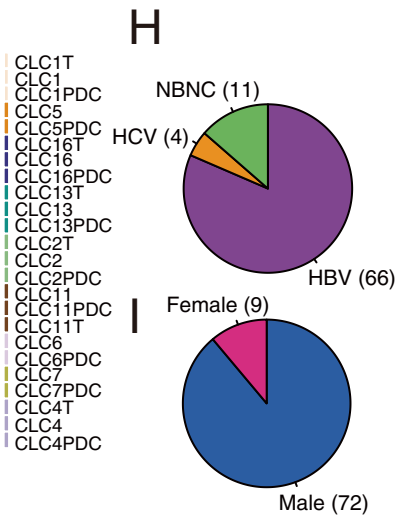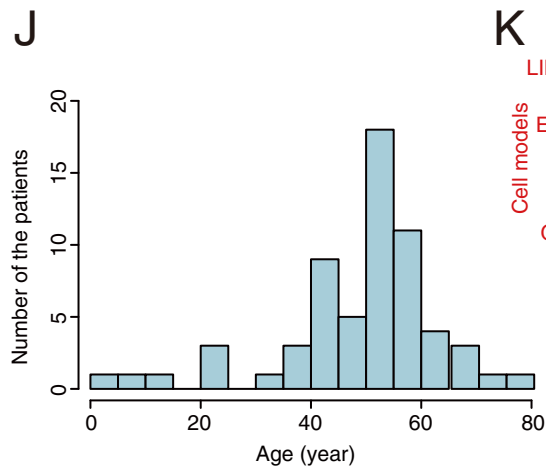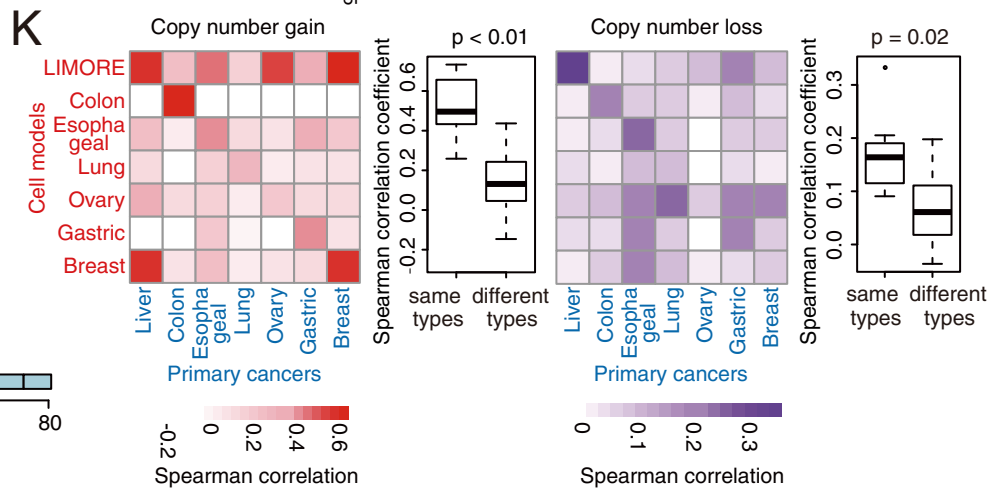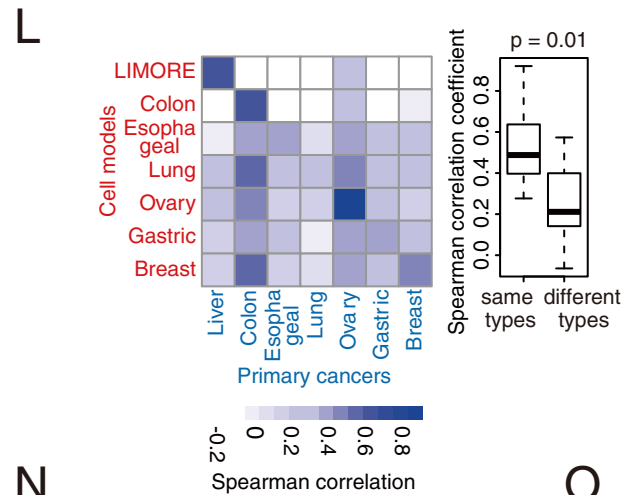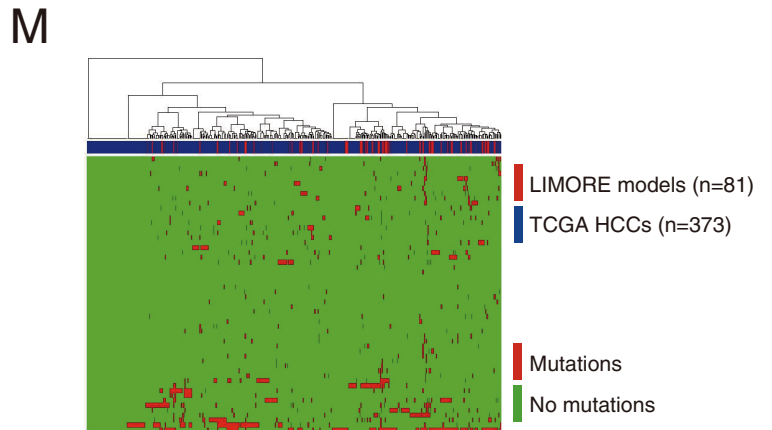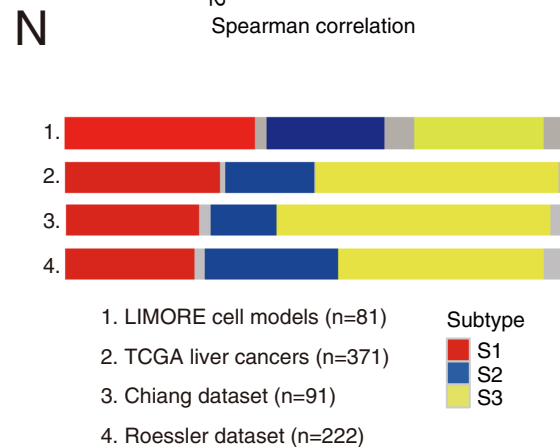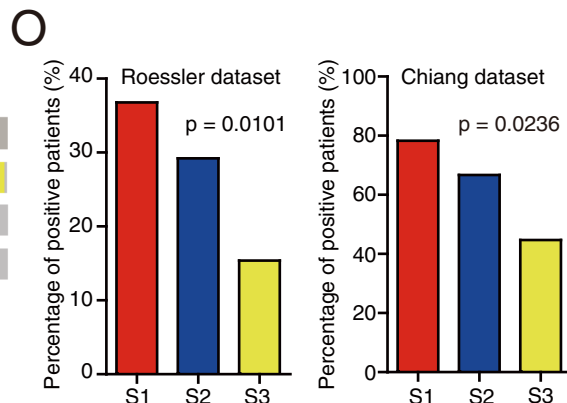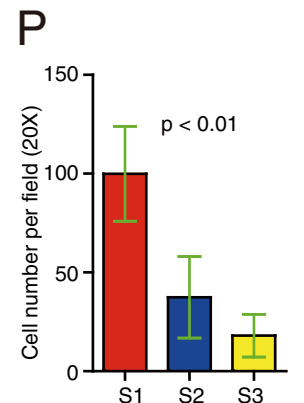

**Figure S1. Overview of LIMORE platform and epidemiological and intertumor heterogeneities between cell models and primary cancers, Related to Figure 1.**

(A) Schematic outline for Liver Cancer Model Repository (LIMORE). Current version of LIMORE consists of 81 liver cancer cell models, including 31 collected publically available cell models, and 50 generated models from surgically resected Chinese HCCs. A web platform is provided to help the community to use LIMORE ([www.picb.ac.cn/limore/](http://www.picb.ac.cn/limore/) or <http://limore.sibcb.ac.cn/>). All cell models have been extensively characterized using next-generation sequencing and high-throughput drug screening. Using these datasets, pharmacogenomic landscape was constructed and interrogated to explore gene-drug associations, including biomarkers to improve sorafenib response. CNA, copy number alteration. AMP, amplification.

(B) Pieplot shows population distribution of 31 collected publically available liver cancer cell models.

(C) Representative pictures of early passages of patient-derived cells grown in media with or without Y-27632. Epithelial cells proliferated in media with Y-27632. Scale bars, 100  $\mu\text{m}$ .

(D) Representative pictures of early passages of patient-derived cells grown in media with Y-27632 or with both Y-27632 and A83-01. Epithelial cells were enriched in media with both Y-27632 and A83-01, while cancer associated fibroblast overgrew in media with Y-27632 alone. Scale bars, 100  $\mu\text{m}$ .

(E) Heatmap shows landscapes of genetic alterations for HCC driver genes in the matched patient-derived cells (PDCs) at early-stage passages (< 10 passages, PDC), established cell models (around 20 passages) and primary HCCs. AMP, amplification. HBV, HBV integration.

(F) Paired comparison of the matched cell models, primary HCCs and PDCs using protein-altering somatic mutations.

(G) Heatmap shows Pearson correlation coefficient matrix of gene expression in matched cell

models, primary HCCs and PDCs. Please be noted, that genetic data (E and F) and transcriptomic data (G) for 4 cell models (CLC5, CLC11, CLC13 and CLC16) were adapted from previously published study (Qiu et al., 2016).

(H-J) Distributions of virus infection status (H), gender (I) and age (J) of liver cancer patients which all the 81 liver cancer cell models were derived from. NBNC, non-HBV and non-HCV.

(K and L) Spearman correlations of CNAs (K) and somatic mutations (L) between cell models and primary cancers from 7 types of cancers. Boxplot shows the coefficients between cell models and primary cancers from the same types or different types. For box-and-whisker plot, the box indicates IQR, the line in the box indicates the median, the whiskers indicate points within  $Q3+1.5\times IQR$  and  $Q1-1.5\times IQR$  and the points beyond whiskers indicate outliers. Statistical significance was determined by unpaired Student's t-test.

(M) Hierarchical clustering analysis of whole exome somatic mutations at the gene level between LIMORE (n=81) and TCGA liver cancers (n=373) using Ward algorithm.

(N) Molecular transcriptome classification of LIMORE models and 3 published cohorts of primary liver cancers using a HCC classification system. The red, blue and yellow show that the samples are classified into S1, S2 and S3 subtype with high confidence (FDR < 0.25), respectively. The grey indicates the classification of the samples with FDR > 0.25. FDR, false discovery rate.

(O) Venous metastasis (left) and vascular invasion (right) of primary liver cancers from different transcriptome subtypes. Statistical significance was determined by Chi-square test.

(P) Migration abilities of LIMORE models from different transcriptome subtypes, as determined by *in vitro* Transwell assay. Data are presented as mean $\pm$ SEM. Statistical significance was determined by Kruskal–Wallis test.

**A**

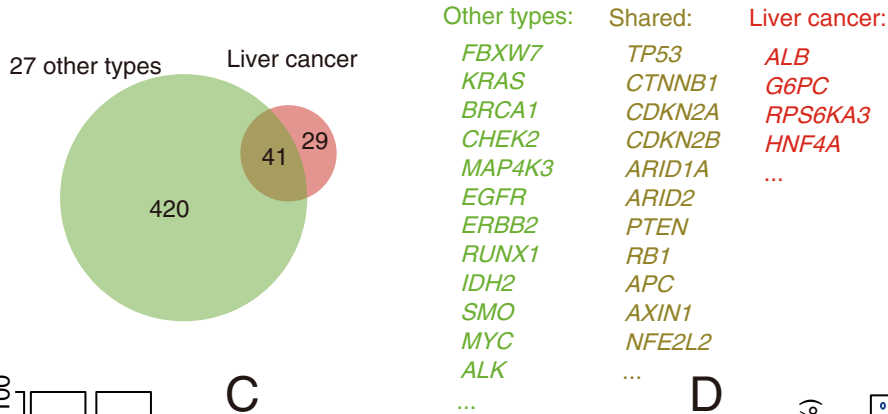

**B**

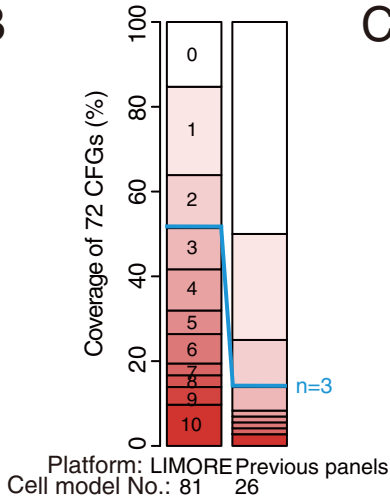

**C**

| Mutations                | LIMORE | Previous panels |
|--------------------------|--------|-----------------|
| <i>CTNNB1</i> activating | 8      | 3               |
| <i>TERT</i> HBV          | 16     | 3               |
| <i>RB1</i>               | 5      | 1               |
| <i>PIK3CA</i>            | 2      | 0               |
| <i>RPS6KA3</i>           | 2      | 0               |

**D**

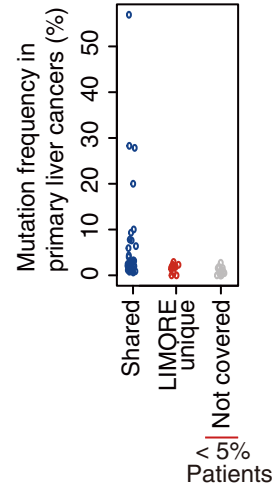

**E**

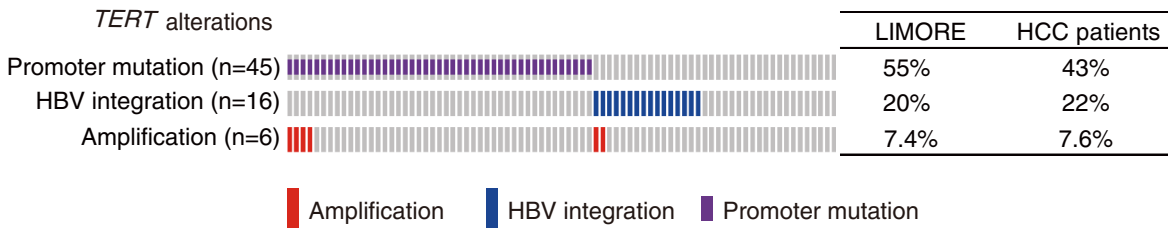

**F**

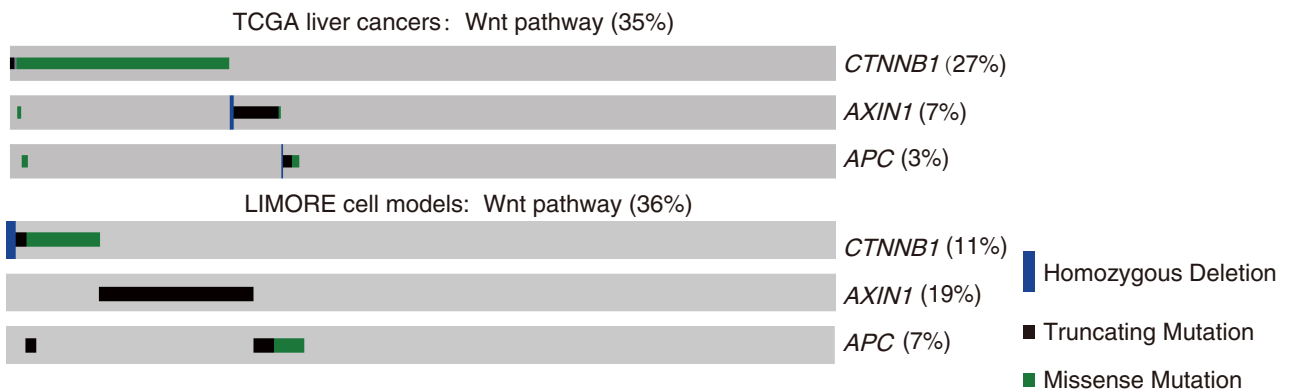

**G**

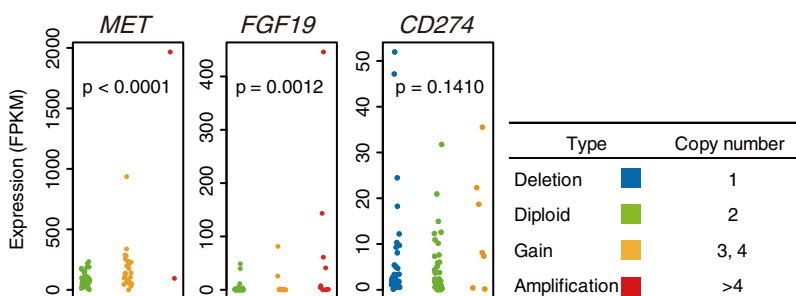

**Figure S2. Comparison of cancer functional genes, Related to Figure 2.**

(A) Venn diagram shows comparison of mutational cancer functional genes (CFGs) between LIMORE and reported IntOGen pan-cancer database ([www.intogen.org](http://www.intogen.org)). Highlighted are representative recurrently mutational genes specifically in liver cancers or 27 other types of cancers.

(B) Coverage of CFG alterations by liver cancer models from LIMORE or previous panels. The number in the bar indicates how many cell models harbor alterations of a CFG.

(C) Representation of key CFGs by liver cancer models in LIMORE and previous cell panels.

(D) Mutational frequencies of CFGs in primary liver cancer cohorts with mutational data available.

(E) Patterns of multiple types of alterations in *TERT* gene in LIMORE (left) and the comparison of mutational frequencies to primary liver cancers (right).

(F) Oncoprint plot of Wnt-related alterations (*CTNNB1*, *AXIN1* and *APC*) in TCGA liver cancers (n=373) and LIMORE (n=81). Truncating mutations included nonsense, frameshift and splicing mutations. The alteration frequencies are indicated. The visualization was performed using Oncoprint tool in cBioPortal ([www.cbioportal.org](http://www.cbioportal.org)).

(G) Evaluation of potential targets in liver cancers and their mRNA expression levels, including *FGF19* or *MET* amplifications. Gene expression levels in RNA-Seq were presented as FPKM (fragments per kilobase of exon per million fragments mapped). Statistical significance was determined by Kruskal–Wallis test.

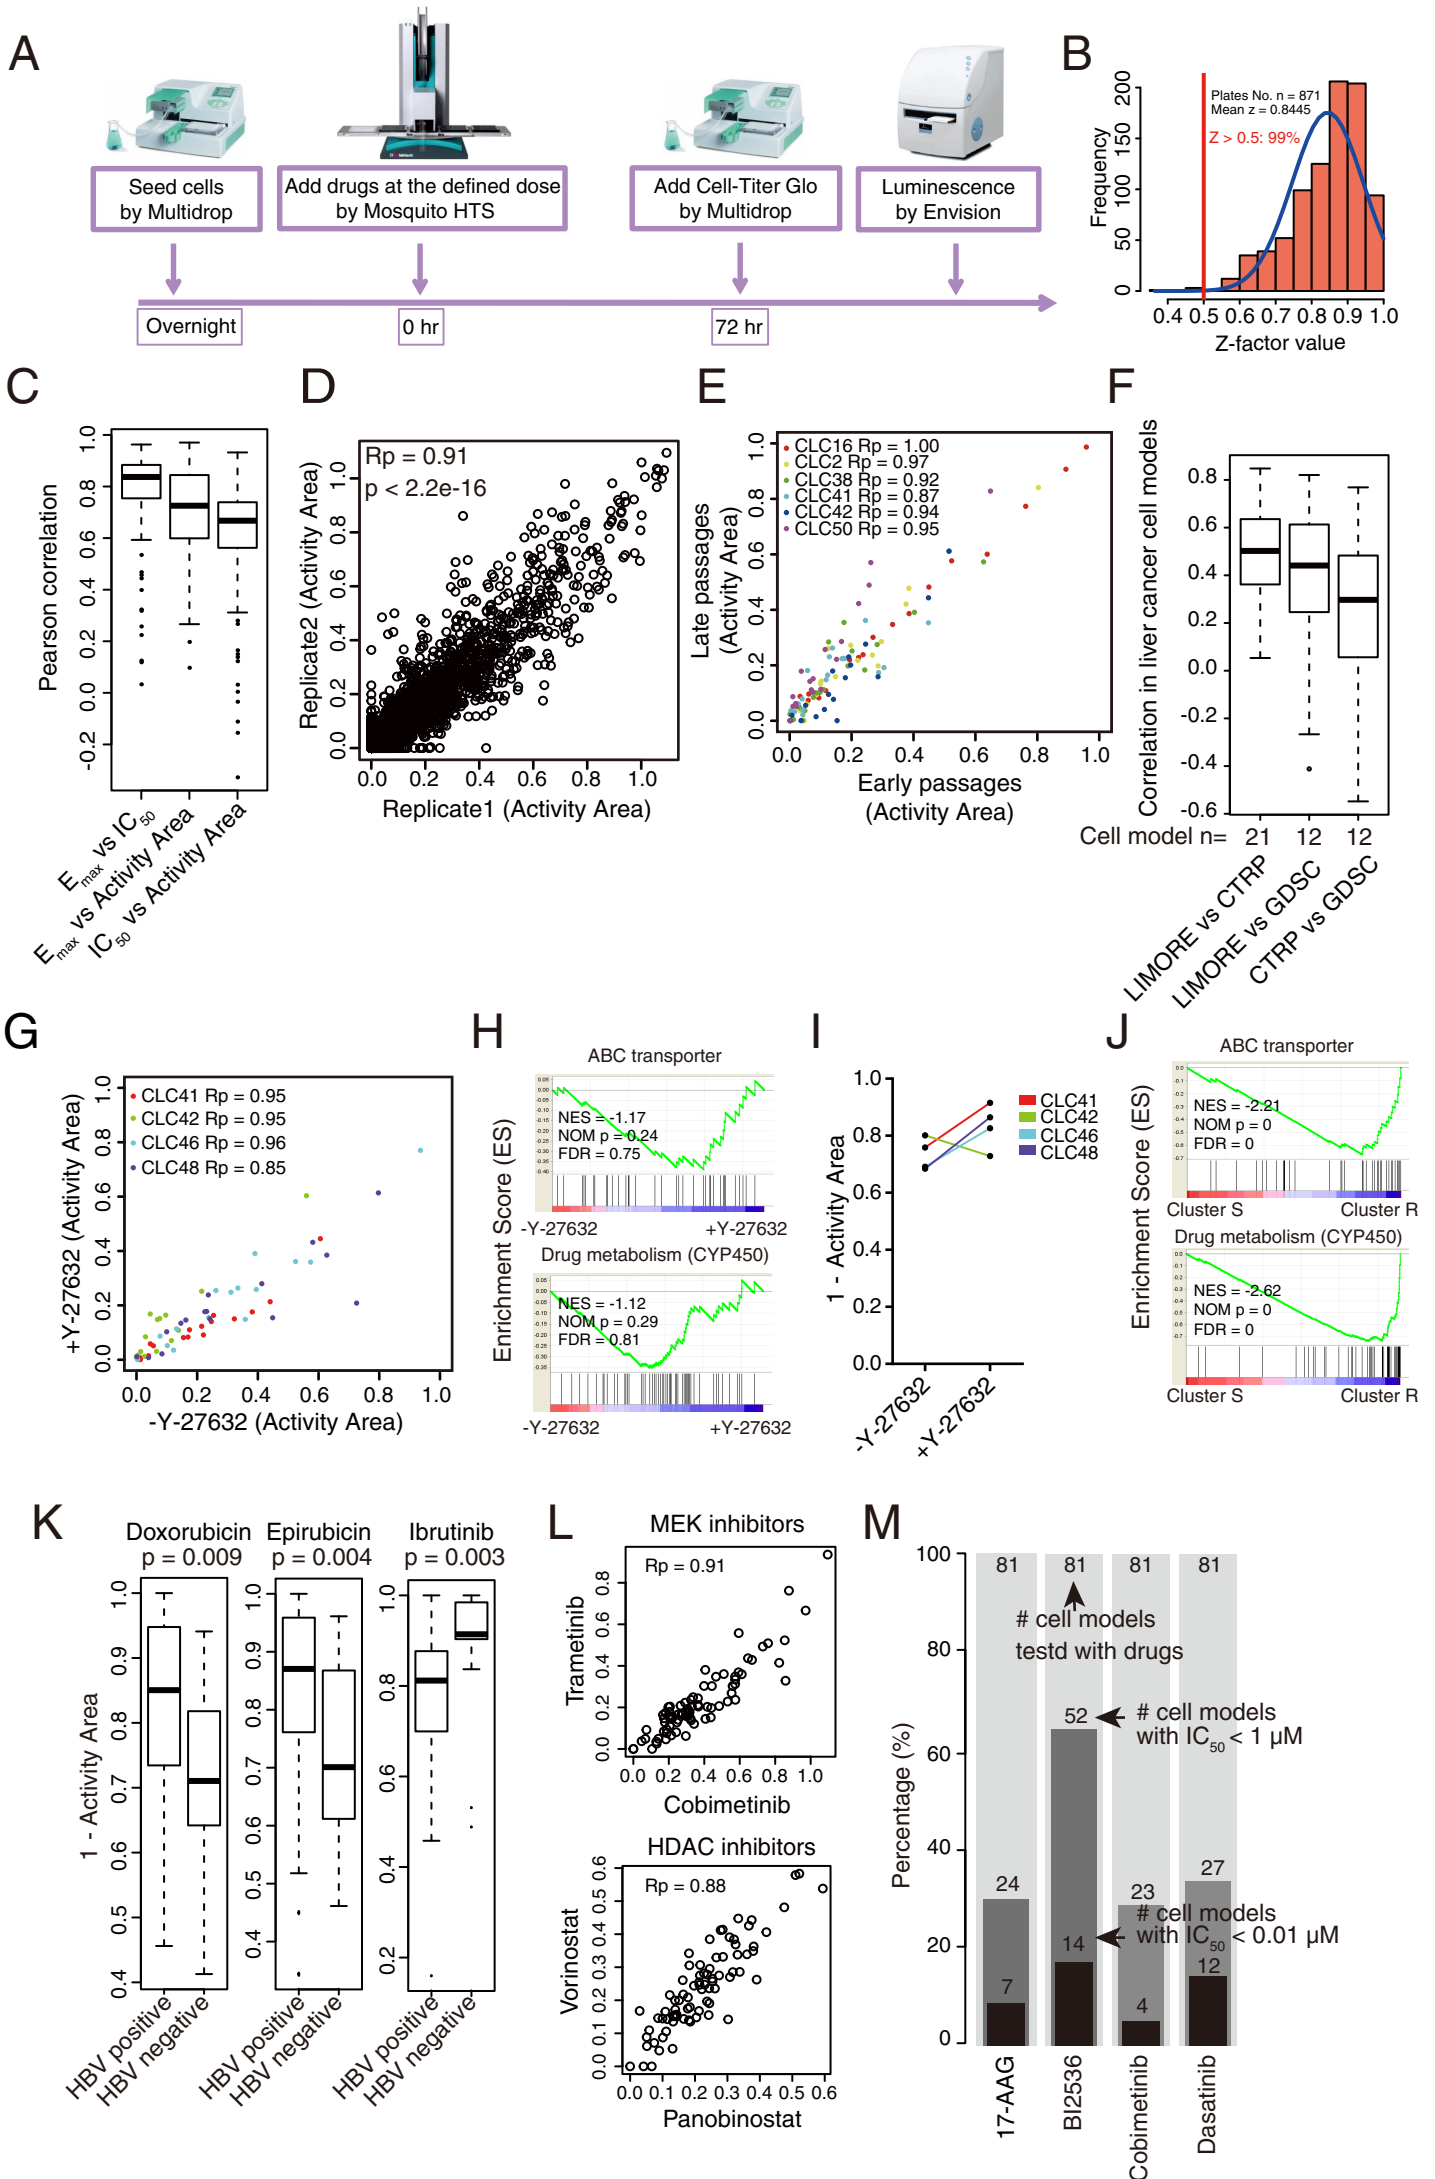

**Figure S3. The high-throughput drug screening, Related to Figure 3.**

(A) Schematic outline of the high-throughput drug screening protocol.

(B) The histogram shows the distribution of Z-prime values from 871 screening 384-well plates.

(C) Boxplot shows Pearson correlations of Activity Area (AA),  $IC_{50}$  and  $E_{max}$  for 90 drugs tested in LIMORE.

(D) Scatterplot shows the Pearson correlation of AA values for biological replicates of drug screening data.

(E) Scatterplot shows the Pearson correlation of AA values for 6 LIMORE models (> 20 passages) and the matched early passage cells (< 10 passages).

(F) Boxplot shows Spearman correlations of drug responses for 38 drugs in liver cancer cell models among different datasets. Liver cancer cell models in CCLE and CTRP were combined as one dataset (CTRP) and drug results in CTRP were used. Drug response in CTRP was presented as area-under-curve (AUC) value. Drug response in GDSC is presented as  $IC_{50}$  value.

(G) Scatterplot shows the Pearson correlation of AA values for 4 cell models analyzed in media with or without Y-27632.

(H) Gene sets involved in drug transporter or metabolism are not enriched in cell models cultured with Y-27632, as demonstrated by Gene Set Enrichment Analysis (GSEA). NES, normalized enrichment score in GSEA. FDR, false discovery rate.

(I) Scatterplot shows 1-Activity Area values of paclitaxel in 4 cell models analyzed in media with or without Y-27632.

(J) Gene sets enriched in Cluster R cell models, as demonstrated by Gene Set Enrichment Analysis (GSEA). Gene sets involved in drug transporter or metabolism are shown.

(K) Boxplots show 1-Activity Area values of doxorubicin, epirubicin and ibrutinib in HBV positive



(n=66) and negative (n=15) LIMORE models. Statistical significance was determined by Wilcoxon rank-sum test.

(L) Scatterplots show the Pearson correlation of AA values for drugs targeting MEK and HDAC, respectively.

(M) The number of LIMORE models for each cutoff of  $IC_{50}$  values of the four indicated drugs.

For box-and-whisker plot, the box indicates IQR, the line in the box indicates the median, the whiskers indicate points within  $Q3+1.5 \times IQR$  and  $Q1-1.5 \times IQR$  and the points beyond whiskers indicate outliers.

**A**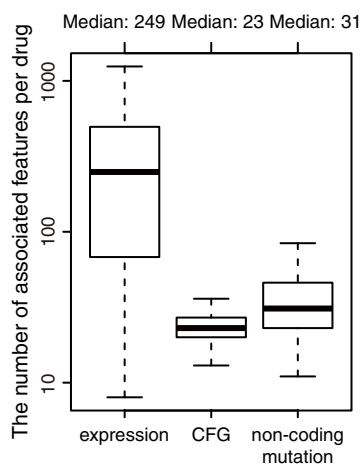**B**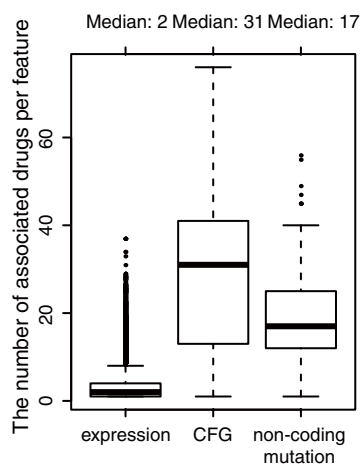**C**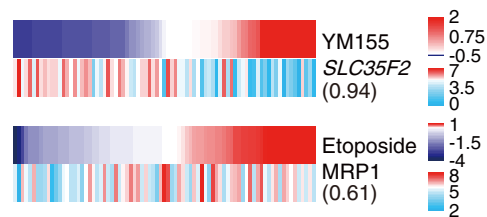**D**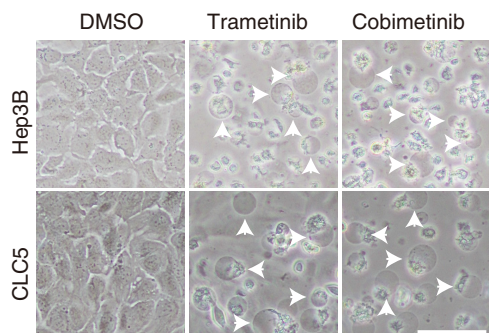**E**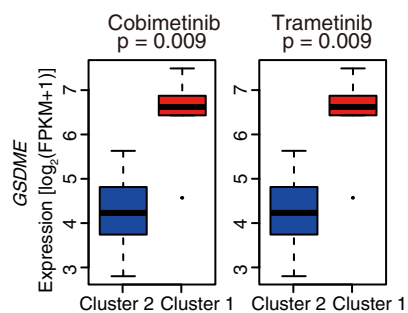**F**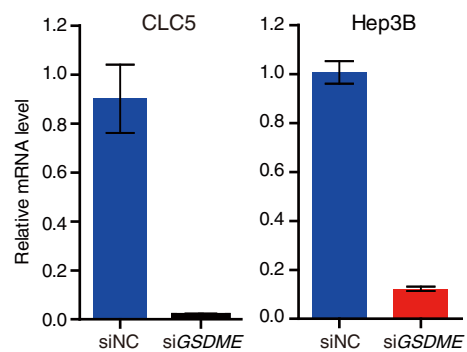

**Figure S4. Pharmacogenomic analysis in LIMORE, Related to Figure 4.**

(A and B) Boxplots show the number of associated features per drug (A) and the number of associated drugs per feature (B). Features with EN score  $> 0.60$  were included.

(C) Heatmaps show the gene-drug associations for YM155 and etoposide. Rank-ordered sensitivity values are indicated as upper heatmap with corresponding features plotted below. The number in the parentheses indicates the EN score.

(D) Morphology characteristics of LIMORE models treated with Cobimetinib ( $10\ \mu\text{M}$ ) or Trametinib ( $0.5\ \mu\text{M}$ ) for 48 hr. Scale bars,  $100\ \mu\text{m}$ .

(E) Boxplots show the RNA-seq expression values for *GSDME* in Cluster 1 or 2 subgroup of LIMORE models. Statistical significance was determined by unpaired Student's t-test.

(F) Knockdown efficiency of *GSDME* siRNA in CLC5 and Hep3B as determined by Real-time qPCR. Data are presented as  $\text{mean} \pm \text{SD}$ . siNC, nontargeting siRNA control.

For box-and-whisker plot, the box indicates IQR, the line in the box indicates the median, the whiskers indicate points within  $Q3 + 1.5 \times \text{IQR}$  and  $Q1 - 1.5 \times \text{IQR}$  and the points beyond whiskers indicate outliers.

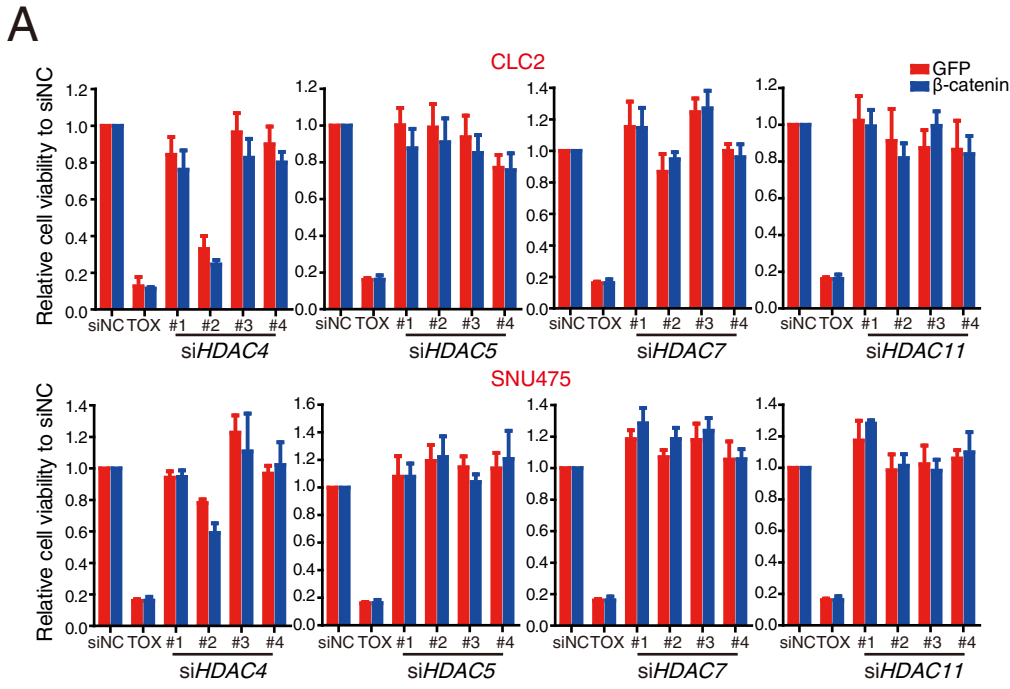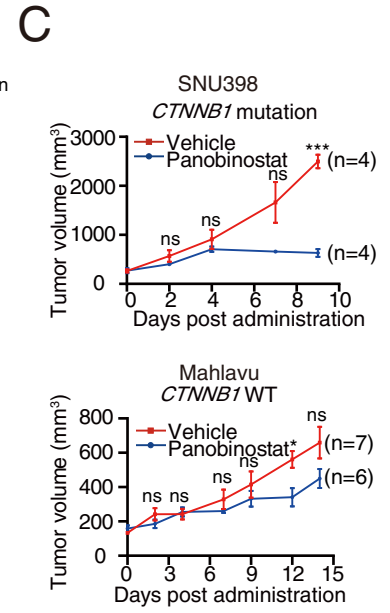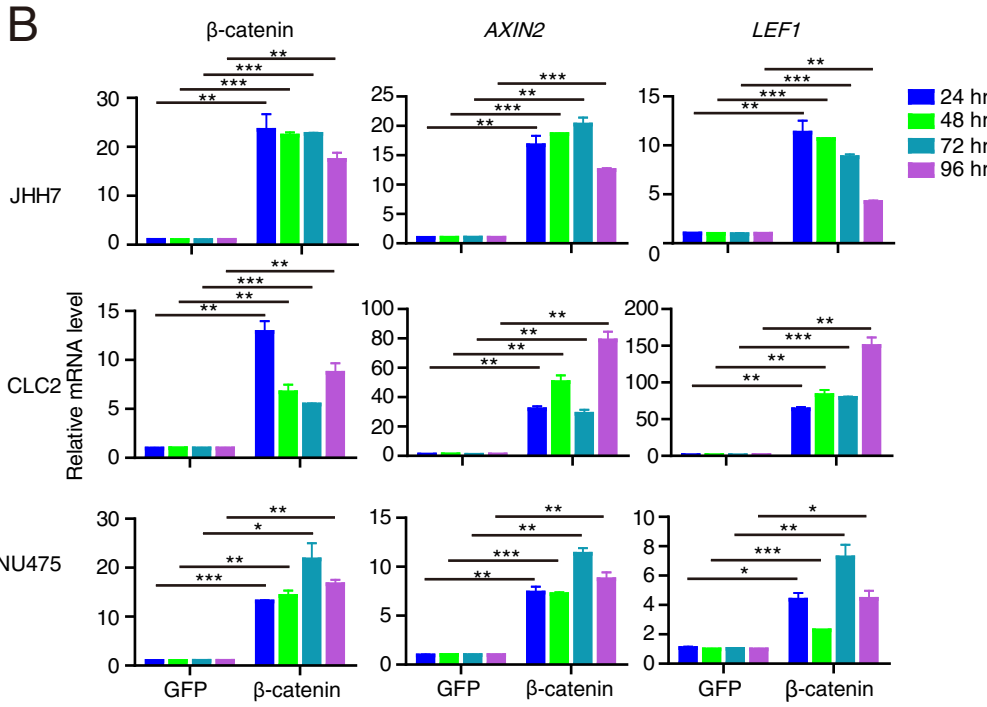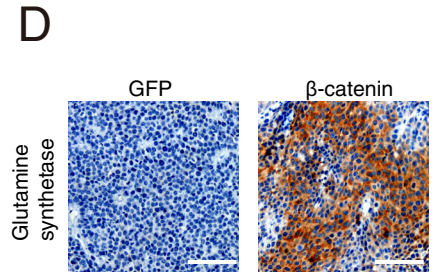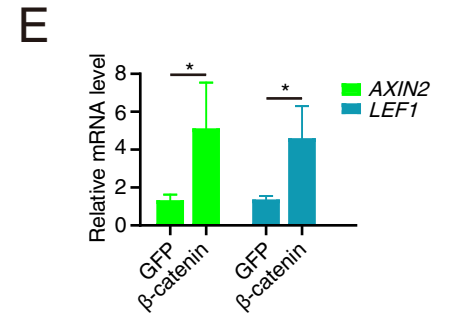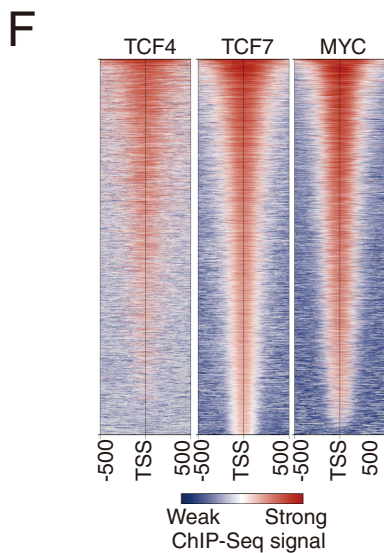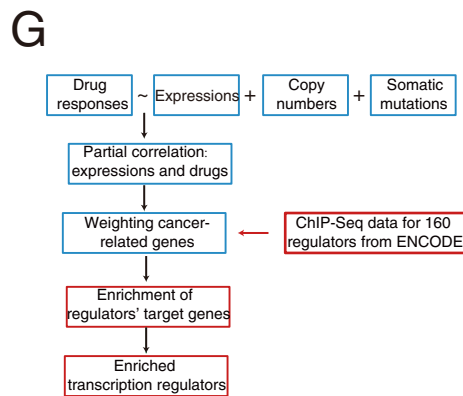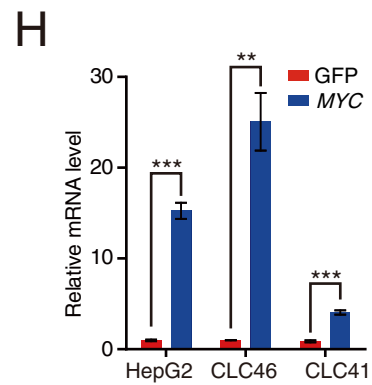

**Figure S5. Synthetic lethal interactions with Wnt activation, Related to Figure 5.**

(A) Relative cell viabilities of CLC2 and SNU475 cells after  $\beta$ -catenin overexpression with siRNA mediated knock-down of *HDAC4*, *HDAC5*, *HDAC7*, *HDAC11* for 72 hr. GFP is the control group. siNC, nontargeting siRNA control. TOX, transfection control used to assess transfection efficiency. Data are presented as mean $\pm$ SD. Experiments were biologically repeated in triplicate and one representative result is shown.

(B) mRNA levels of  $\beta$ -catenin and target genes *AXIN2*, *LEF1* measured by qPCR in JHH7, CLC2 and SNU475 cells at different time points. Data are presented as mean $\pm$ SD.

(C) Tumor growth curves of SNU398 and Mahlavu treated with panobinostat or vehicle. Data are presented as mean $\pm$ SEM.

(D) Representative pictures of glutamine synthetase (GS) staining on JHH7-GFP and JHH7- $\beta$ -catenin derived cancers. n=4 mice for JHH7-GFP and n=3 mice for JHH7- $\beta$ -catenin. Scale bars, 100  $\mu$ M.

(E) mRNA levels of  $\beta$ -catenin target genes *AXIN2* and *LEF1* measured by qPCR in JHH7-GFP and JHH7- $\beta$ -catenin derived cancers. n=4 mice for JHH7-GFP and n=3 mice for JHH7- $\beta$ -catenin. Data are presented as mean $\pm$ SD.

(F) Heatmap shows the co-binding of TCF4, TCF7 and MYC on TCF4 bound promoter regions (4733 peaks) as determined by ChIP-Seq profiles in HepG2. TSS, transcription start site.

(G) Outline for drug response-associated transcription regulator analysis by integrating RNA-Seq data from LIMORE and ChIP-Seq data from ENCODE.

(H) mRNA levels of *MYC* measured by qPCR in HepG2, CLC46 and CLC41 cells. Data are presented as mean $\pm$ SD.

\*p < 0.05, \*\*p < 0.01, \*\*\*p < 0.001 by unpaired Student's t-test.

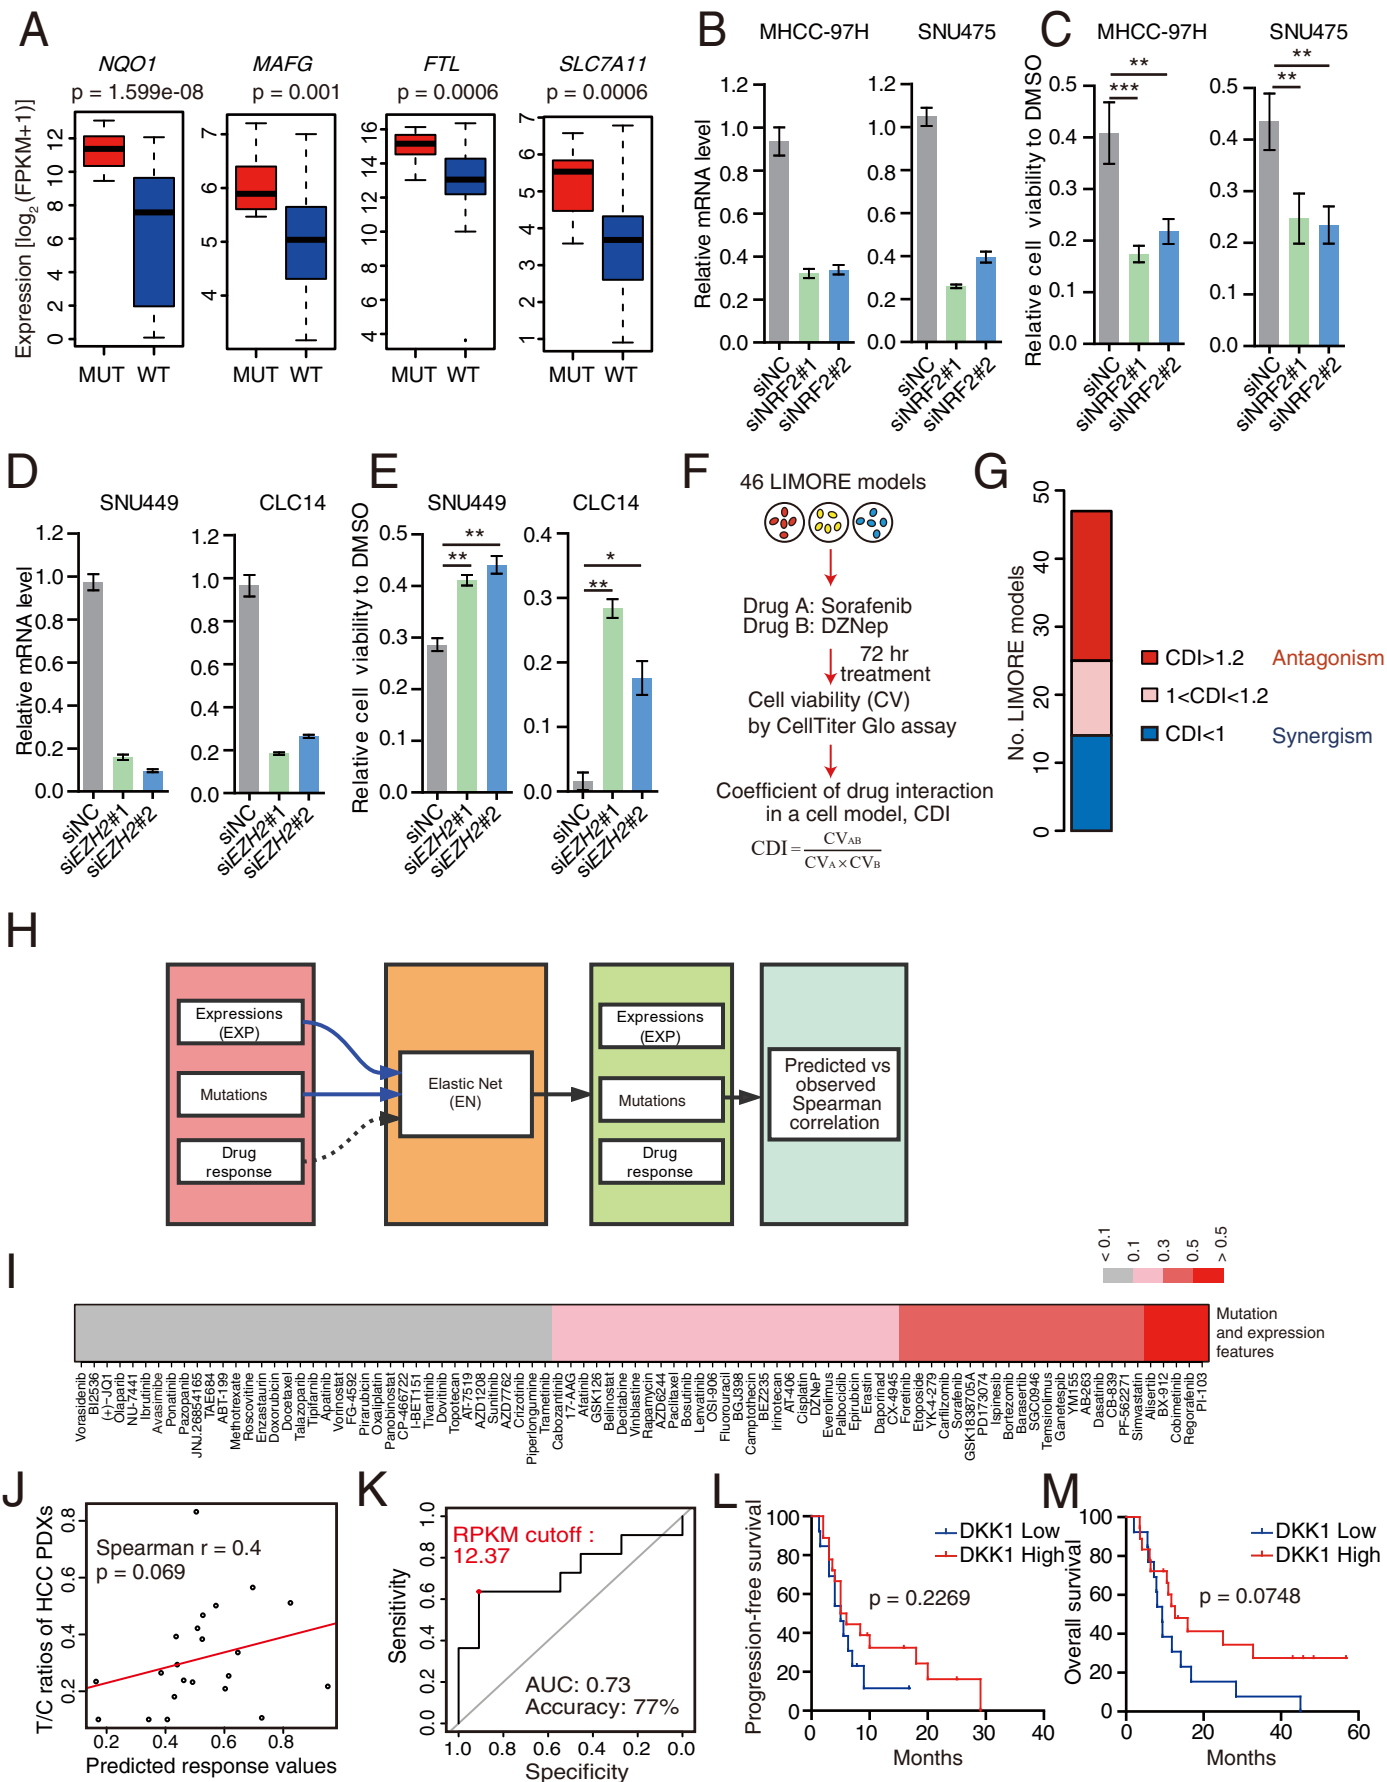

**Figure S6. Prediction models and biomarkers for sorafenib sensitivity, Related to Figure 6.**

(A) Boxplots show the mRNA levels of NRF2 downstream genes in LIMORE models with or without *KEAP1* mutation. MUT, mutation. Statistical significance was determined by unpaired Student's t-test.

(B-E) Knockdown efficiencies of NRF2 siRNA in MHCC-97H and SNU475 (B) and *EZH2* siRNA in SNU449 and CLC14 (D) were determined by qPCR. The relative cell viabilities of MHCC-97H and SNU475 with NRF2 knockdown (C) or SNU449 and CLC14 with *EZH2* knockdown (E) were detected after 6  $\mu$ M sorafenib treatment for 72 hr. Data are presented as mean $\pm$ SD. \* $p < 0.05$ , \*\* $p < 0.01$ , \*\*\* $p < 0.001$  by unpaired Student's t-test. siNC, nontargeting siRNA control. Experiments were biologically repeated in triplicate and one representative result is shown.

(F) Overview of sorafenib and DZNep combination screening in 46 LIMORE models. Single-dosed DZNep (10  $\mu$ M) and sorafenib (5  $\mu$ M) was simultaneously added to treat LIMORE models. The relative cell viability was calculated for the drug A, drug B and combination of A and B, respectively. The combination effect was evaluated by the coefficient of drug interaction (CDI).

(G) Barplot shows the distribution of combination effects of DZNep and sorafenib in 46 LIMORE models. For the CDI, 1 indicates drug additivity;  $CDI > 1$  means the antagonistic effects of two drugs;  $CDI < 1$  means the synergistic effects.

(H) Strategies to build prediction models for drug responses using elastic net (EN) regression in LIMORE. The prediction models were constructed in 54 training cell models and validated in 27 independent cell models.

(I) Heatmap shows Spearman correlation between predicted and detected drug responses for sorafenib in 27 LIMORE models.

(J) Scatterplot shows the Spearman correlation of predicted response values and treatment-to-control (T/C) ratios of patient-derived xenografts (PDXs). 22 HCC PDXs were treated with

sorafenib (40 mg/kg) and T/C ratios were monitored. n=10 mice for each PDX.

(K) ROC (receiver operating characteristics) curve of *DKK1* expression levels and sorafenib responses in 22 HCC PDXs.

(L and M) Kaplan-Meier plots for progression-free (L) and overall (M) survival. 31 HCC patients whose serum samples collected before sorafenib treatment were analyzed. Statistical significance was determined by Log-rank test.

For box-and-whisker plot, the box indicates IQR, the line in the box indicates the median, the whiskers indicate points within  $Q3+1.5 \times IQR$  and  $Q1-1.5 \times IQR$  and the points beyond whiskers indicate outliers.
